# Supplementary material
Source: bioRxiv or medRxiv preprint supplement (https://www.biorxiv.org/highwire/filestream/110766/field_highwire_adjunct_files/0/237008-1.pdf)
Supplement: Supplementary file [file 237008-1.pdf]

**Supplementary Material for**

**Title: Spatial organization of single mRNPs at different stages along the gene expression pathway**

Srivathsan Adivarahan<sup>1</sup>, Nathan Livingston<sup>2</sup>, Beth Nicholson<sup>3</sup>, Samir Rahman<sup>1</sup>, Bin Wu<sup>2</sup>, Olivia Rissland<sup>3,4</sup> and Daniel Zenklusen<sup>1\*</sup>

(1) Département de Biochimie et médecine moléculaire, Université de Montréal,  
Montréal, Québec, Canada

(2) Johns Hopkins School of Medicine, Biophysics and Biophysical Chemistry, Center  
for Cell Dynamics, Baltimore, USA

(3) Molecular Medicine Program, The Hospital for Sick Children, Toronto, Canada

(4) Current address: Department of Biochemistry and Molecular Genetics, University of  
Colorado School of Medicine, Aurora, USA

**\*Corresponding author:** [daniel.r.zenklusen@umontreal.ca](mailto:daniel.r.zenklusen@umontreal.ca)

**This document includes:**

Materials and Methods

Figs. S1 to S7

Tables S1 + S2 + S3

## **MATERIALS AND METHODS**

### **Reagents used, stock concentrations, working concentrations and treatment conditions**

Puromycin dihydrochloride (Sigma P8833) – stock at 5 mg/ml in water, Cycloheximide (Sigma C7698-1G) – stock 5 mg/ml in ethanol, Sodium Arsenite (Sigma 35000-1L-R) – stock 50 mM in water, Homoharringtonine (Sigma SML1091-10MG) – stock 10mg/ml in DMSO. The drugs were diluted in warm media to get final working concentrations and cells were treated prior to fixation as follows: Puromycin (100 µg/ml for 10 min), Cycloheximide (100 µg/ml for 10 min), Homoharringtonine – 100µg/ml for 10 mins or 1hr and Sodium Arsenite (2 mM for 1 hour).

### **Cell culture and drug treatment**

HEK293 and U2OS osteosarcoma cell lines were maintained at 37°C and 5% CO<sub>2</sub> in Dulbecco's Modified Eagle Medium (DMEM) (Wisent, 319-005-CL) supplemented with 10% fetal bovine serum (FBS) (Wisent, 080-150) and passaged every 2-3 days with Trypsin (Wisent 325-043-EL). Cells were plated on poly-L-Lysine (Sigma, P8920) coated coverslips the day before treatment and fixation. On the day of the experiment, media was replaced with fresh warm media containing drug in indicated concentrations and placed back in the incubator. After treatment, the cells were briefly washed with 1xPBS, fixed with 4% paraformaldehyde in 1xPBS (pH 7.4) for 10 minutes at room temperature, washed three times with 1xPBS and stored overnight in 70% ethanol at -20°C for permeabilization. Alternatively, the cells were permeabilized using 0.1% TritonX-100 + 0.5%BSA in 1x PBS for 15mins after which they were washed 2 times with 1x PBS for 5 mins each immediately before using the samples for smFISH.

**Plasmid Preparation:** The phage-ubc-flag-24xSunTag-Fluc-oxBFP-AID-baUTR-24xMS2 plasmid was prepared as described in (1).

## **Generation and screening of EIF4G1 and PABPC1 mutant cell lines**

Mutant cell lines were generated using CRISPR-Cas9. To produce sgRNAs targeting either EIF4G1 or PABPC1, annealed DNA oligos (Table S1) were ligated into the BbsI site of plasmid pX330 (Ran 2013). Homology repair constructs containing the intended mutations and upstream and downstream homology arms (~1 kb in total) were ligated into the plasmid Lox-Stop-Lox-TOPO- $\Delta$  stop (Rakheja 2014), in which homology arms are cloned surrounding a puromycin resistance cassette flanked by loxP sites (Table S1).

HEK293 cells ( $5 \times 10^5$  cells in one well of a 6-well plate) were transfected with 250 ng of the pX330-sgRNA construct and 1  $\mu$ g of the repair construct using Lipofectamine 2000 according to the manufacturer instructions, and then incubated in EMEM supplemented with 10% FBS in a humidified incubator at 37° C with 5% CO<sub>2</sub>. Two days following transfection, cells were trypsinized and 10% of the cells were moved into a 15-cm dish. After 24 h, puromycin was added to a final concentration of 3  $\mu$ g/mL, and the media was changed daily for the next 3 days. The following day, single cells were seeded into each well of a 96-well plate on a MoFlo Astrios cell sorter (Beckman Coulter) at the Flow and Mass Cytometry Facility at SickKids Hospital, Toronto. Following expansion of single colonies, cells were harvested and screened by PCR using primers that anneal to the genome outside of the homology arm region (Table S1). To excise the puromycin resistance cassette from positive clones, the cells were transfected with 1  $\mu$ g of pgk-Cre (2) and incubated for 3 days before single-cell seeding, expansion, and screening for loss of the puromycin

resistance gene by PCR as described above. The PCR products were analyzed by Sanger sequencing to ensure that the intended mutations were present.

### **Cell viability assays**

Cell viability was measured using PrestoBlue Cell Viability Reagent (Invitrogen) according to the manufacturer's instructions. Briefly, cells were seeded in triplicate in 96-well plates at 1000 cells per well in 90  $\mu$ L of EMEM supplemented with 10% FBS, and then incubated at 37° C with 5% CO<sub>2</sub>. At 24 h, 48 h, and 72 h after seeding, 10  $\mu$ L of PrestoBlue reagent was added to each well. After a further 6.5-h incubation at 37°C with 5% CO<sub>2</sub>, the fluorescence of each well was read on a SpectraMax M2 microplate reader (Molecular Devices).

### **Polysome profiling**

To generate polysome profiles, cycloheximide was added to cells in a 10-cm dish to a final concentration of 100  $\mu$ g/mL, and the cells were incubated for 10 min at 37°C. The cells were then placed on ice and washed twice with ice-cold PBS containing 100  $\mu$ g/mL cycloheximide. Cells were lysed by shearing four times through a 26-gauge needle in 500  $\mu$ L of lysis buffer (10 mM Tris-HCl pH 7.4, 5 mM MgCl<sub>2</sub>, 100 mM KCl, 1% Triton X-100, 2 mM DTT, 500 U/ml Rnasin (Promega), EDTA-free protease inhibitor cocktail (Sigma), 100  $\mu$ g/mL cycloheximide). Following centrifugation at 1300  $\times$  g for 10 min at 4°C, the supernatant was collected, flash frozen in liquid nitrogen, and stored at -80°C until further processing.

Lysates were separated by loading 300  $\mu$ L onto a 10-50% (w/v) sucrose gradient prepared with a Gradient Master (BioComp Instruments) and centrifuging for 2 h at 36,000 rpm in a SW41Ti rotor (Beckman Coulter) at 4° C. Gradients were fractionated on a Piston Gradient Fractionator

(BioComp) coupled to a EM-1 Econo UV detector (Bio-Rad). UV profile data were recorded using Gradient Profiler software v 2.07 (BioComp).

### **smRNA FISH**

Custom DNA probe sets were designed using Stellaris<sup>®</sup> Probe Designer, synthesized by Biosearch Technologies containing 3' amine reactive group and labeled with far red dye Cy5 (GEPA25001), red dyes Cy3 (GEPA23001) from Sigma or Dylight 550 (Thermo Scientific 62263) or green dye Dy488 (Thermo Scientific 46403) as described in (3). Probe sequences are shown in Table S2. Probe combination used are shown in Table S3. smFISH was done as described in (4). Prior to hybridization, cells were rehydrated in 1xPBS, then washed with 10% formamide/2xSSC for 10 minutes at room temperature. The cells were hybridized with 10-20 ng of each probe mix plus 40 µg of ssDNA/tRNA resuspended in the hybridization solution (10% dextran sulfate/10% formamide/2xSSC/2 mM VRC/0.1 mg/ml BSA) for 3 hours in the dark at 37°C. Post hybridization washes (2x 30 min) were carried out at 37°C with 10% formamide/2xSSC. Samples were then rinsed with 1xPBS and mounted with ProLong Gold antifade reagent with DAPI (P36935, Invitrogen).

### **Image Acquisition and pixel shift correction**

Images were acquired with a 63x NA 1.46 oil objective on a Zeiss Elyra PS.1 system equipped with an Andor EMCCD iXon3 DU-885 CSO VP461 camera (1004x1002 pixels), the following filter sets: DAPI: BP420-480 + LP750 (Zeiss SR cube 07), Cy2: BP495-590+LP750 (Zeiss SR cube 13), Cy3: LP570 (Zeiss SR cube 14), Cy5: LP655 (Zeiss SR cube 10) and the following lasers: 50 mW 405 nm HR diode, 100 mW 488 nm HR diode, 100 mW 561 nm HR DPSS, 150 mW 642 nm HR diode. Each image was acquired using 3 rotations and a grid size of 42 µm for all

channels. The microscope was located in a temperature-controlled room and samples were kept in the room for at least an hour before imaging to minimize thermal fluctuations. To correct for pixel shifts between channels, 0.1  $\mu\text{m}$  TetraSpec beads (Invitrogen T-7279) were imaged in all channels, and the channel shift values and chromatic aberration were calculated and corrected using the built-in channel alignment tool in ZEN 2012 SP5 which uses an affine image alignment algorithm and later applied to the images. This correction was calculated for each day of imaging.

### **RNA spot detection, spot assignment and distance measurements**

For image analysis, 3D datasets were reduced to 2D data using maximum projections in FiJi. Spot detection was done by 2D Gaussian fitting as described in (5, 6). For 3D analysis, the spots were detected using AIRLOCALIZE as described in (7). To separate cytoplasmic and nuclear mRNPs, masks were created in FiJi by manual segmentation using DAPI stained nuclei as reference, while ensuring that regions with overlapping spots within the same channel were not included. Assignment of the 5', 3' and/or the mid spots to either the cytoplasmic or the nuclear masks was done using MATLAB (MathWorks). To measure distances between different regions of mRNPs, spots from different channels were first grouped to assign neighboring spots corresponding a single RNA. This was achieved by using spots from one channel as a reference and finding spots from the other channels within a defined radius using the coordinates from 2D Gaussian fitting or 3D Gaussian fitting using a custom MATLAB script. 300nm for 2D analysis and 400nm for 3D analysis were chosen as radii to limit assigning signals from neighboring RNAs. Groups with more than one spot from each channel, which could correspond to overlapping mRNPs or mRNPs close together in space, were discarded. For 2 color imaging, the 5' signal was taken as reference and for 3 color imaging, the middle was taken as reference. Switching references yielded comparable

results (not shown). 2D or 3D distances between different regions of the mRNPs were then calculated for each signal within a group.

### **Combined smFISH and Immunofluorescence for simultaneous detection of mRNA conformation and nascent translation**

Human U2OS osteosarcoma cell line (American Type Culture Collection HTB-96) expressing stdMCP-HaloTag, phR-scFV-GCN4-sfGFP-GB1-NLS-dWPRE, and pBabe-TIR1-9myc was prepared as described in (1). Single-molecule FISH immunofluorescence was performed as described in (1, 8). In brief, cells were plated on 18mm diameter, 0.13mm thick collagen coated coverslips (Fisher) in a 12-well dish. Cells were then transfected with 250 ng of the phage-ubc-flag-24xSunTag-Fluc-oxBFP-AID-baUTR-24xMS2 construct using X-tremeGENE 9 transfection reagent (XTG9-RO ROCHE). Six hours after transfection, IAA (Sigma-Aldrich) was added to a final concentration of 250  $\mu$ M. 20 hours after transfection, fresh IAA was added to a final concentration of 250  $\mu$ M. 24 hours after transfection, cells were fixed for 10 minutes in PBS + 5 mM MgCl<sub>2</sub> (PBSM), permeabilized for 15 minutes in PBSM + 0.1% Triton-X and 0.5 % BSA, and incubated with 100 nM MS2v5-Cy5 and 50 nM SunTagV4-Qusar 570 smFISH probe sets (Table S2) and primary antibody against GFP (GFP-1010, Aves labs, Inc.) and incubated for three hours at 37°C. After washing, cells were incubated with Alexa Fluor 488 labeled secondary antibody (ThermoFischer) and mounted in ProLong Diamond antifade reagent with DAPI (Life Technologies). Images were acquired on a custom inverted wide-field Nikon Eclipse Ti-E microscope equipped with three Andor iXon DU897 EMCCD cameras (512x512 pixels), Apochromatic TIRF 100X Oil Immersion Objective Lens/1.49 NA (Nikon MRD01991), encoded Stage with 150 micron Piezo Z (ASI), and LU-n4 four laser unit with solid state 405 nm, 488 nm, 561 nm, and 640 nm lasers (Nikon), a TRF89901-EM ET-405/488/561/640nm Laser Quad Band



Filter Set for TIRF applications (Chroma), and Nikon H-TIRF system. Images were acquired using in-unit intermediate 1.5x magnification changer for a final magnification of 150x and independent, epi-illumination from the 488, 561, and 640 nm lasers. Image pixel size: XY, 106.7 nm; Z-step, 200 nm. A total of 29 cells without drug treatment (total of individual 397 mRNAs) and 40 cells (98 individual mRNAs) upon puromycin treatment we analyzed.

### **Combined smFISH and Immunofluorescence Data Analysis**

All image analysis was performed using existing or custom build packages in MatLab (MathWorks). Gaussian fitting of smFISH and immunofluorescence spot intensities was performed using FISH-quant (9). Briefly, cytoplasmic FISH spots were fit to a 3D Gaussian to determine the mRNA and translation site coordinates in each color. Both 5'-end, 3'-end, and translation site intensities were detected independently by this method. Image registration was performed by imaging 100 nm TetraSpeck Microspheres (ThermoFisher) and calibrating the field correction based on an affine transformation in a custom built MatLab package. The transformation matrix was first verified for reproducibility on other microsphere samples and then applied to mRNA samples (data not shown). Only 2D distances were considered for this analysis. To determine the end-to-end mRNA distance, we first assigned the Quasar 570 channel (SunTag Probes) to FITC channel (Alexa 488 labeled translation site) by setting a colocalization threshold of 300 nm after image correction. We then assigned the Quasar 570 to Cy5 (MS2 Probes), again with a colocalization threshold of 300 nm. We first grouped mRNA with both Cy3 and Cy5 colocalization, and then determined if there was also a colocalized translation site signal. We then binned two-color mRNA based on the presence (translating) or absence (non-translating) of translation site signal. We then determined the end-to-end distance, and, in the case of the translating mRNAs, the associated translation site intensity.

## Data Plotting

All measurements were made for at least 2 independent biological replicates and the data plotted are representative from one of the replicates. For each measurement, at least 5 different fields were imaged with each image containing a minimum of 10 cells to make a total of at least 50 cells. A minimum of 593 RNAs were considered for cytoplasmic plots and a minimum of 430 RNAs were considered for the nuclear plots, unless mentioned otherwise. The center of mass plots in Fig. 1G, 2D, 4D were made using R. The center of mass was calculated as the mean of the coordinates of the three regions. The different conformations were then aligned using their center of masses. For the 3-color scatter plot in Fig. 2E, 4E, S5 and S7, to get a pair of co-localization precision values, two values were chosen randomly from our data. These values were taken as the X and Y coordinates for the scatter plot. The values that served as the X and Y coordinates were used to get density plots in the same figure. The mean Radius of gyration ( $\langle R_g \rangle$ ) was calculated using:

$$\langle R_g \rangle = \sqrt{\frac{1}{3} \sum_{k=1}^3 (r_k - r_{mean})^2}$$

where k represents one of the three regions of the mRNP and  $r_k$  the position of the corresponding position in space as determined by 2D Gaussian fitting.

## Immunoprecipitations and western blotting

Cells were washed with 1X PBS (137 mM NaCl, 2.7 mM KCl, 4.3 mM Na<sub>2</sub>HPO<sub>4</sub>, 1.47 mM KH<sub>2</sub>PO<sub>4</sub>, pH 7.4) and then lysed with 1 ml ice-cold lysis buffer A (100 mM KCl, 0.1 mM EDTA, 20 mM HEPES, pH 7.6, 0.4% NP-40, 10% glycerol, with freshly added 1 mM DTT and complete

mini EDTA-free protease inhibitors [Roche; one tablet per 25 ml lysis buffer]) per 2.5 million cells. 50  $\mu$ l was saved as the input sample. Cells were incubated with antibody (diluted according to manufacturer's instructions) for 2 hours, rotating at 4°C.  $\alpha$ -PABPC1 antibody was purchased from Abcam (ab21060), and  $\alpha$ -eIF4G1 from MBL International. EZ view protein G Sepharose (Sigma) was washed twice with lysis buffer and added to lysate with 40  $\mu$ l slurry used per ml of lysate. The beads and lysate were incubated with the lysate for an additional hour rotating at 4°C. The beads were washed 3X with cold lysis buffer. After the first wash, the beads were transferred to a new tube. The beads were then resuspended in protein loading dye (Life Technologies) with freshly added reducing agent, according to manufacturer's instructions, and boiled for 3 min. 2% lysate and 10% immunoprecipitants were loaded onto an SDS-PAGE gel and probed for PABPC1 and eIF4G1.  $\alpha$ -PABPC1 and  $\alpha$ -eIF4G1 were used at 1:1000, and  $\alpha$ -rabbit IgG HRP (at 1:10,000) was used as the secondary antibody.

## Supplementary Figures

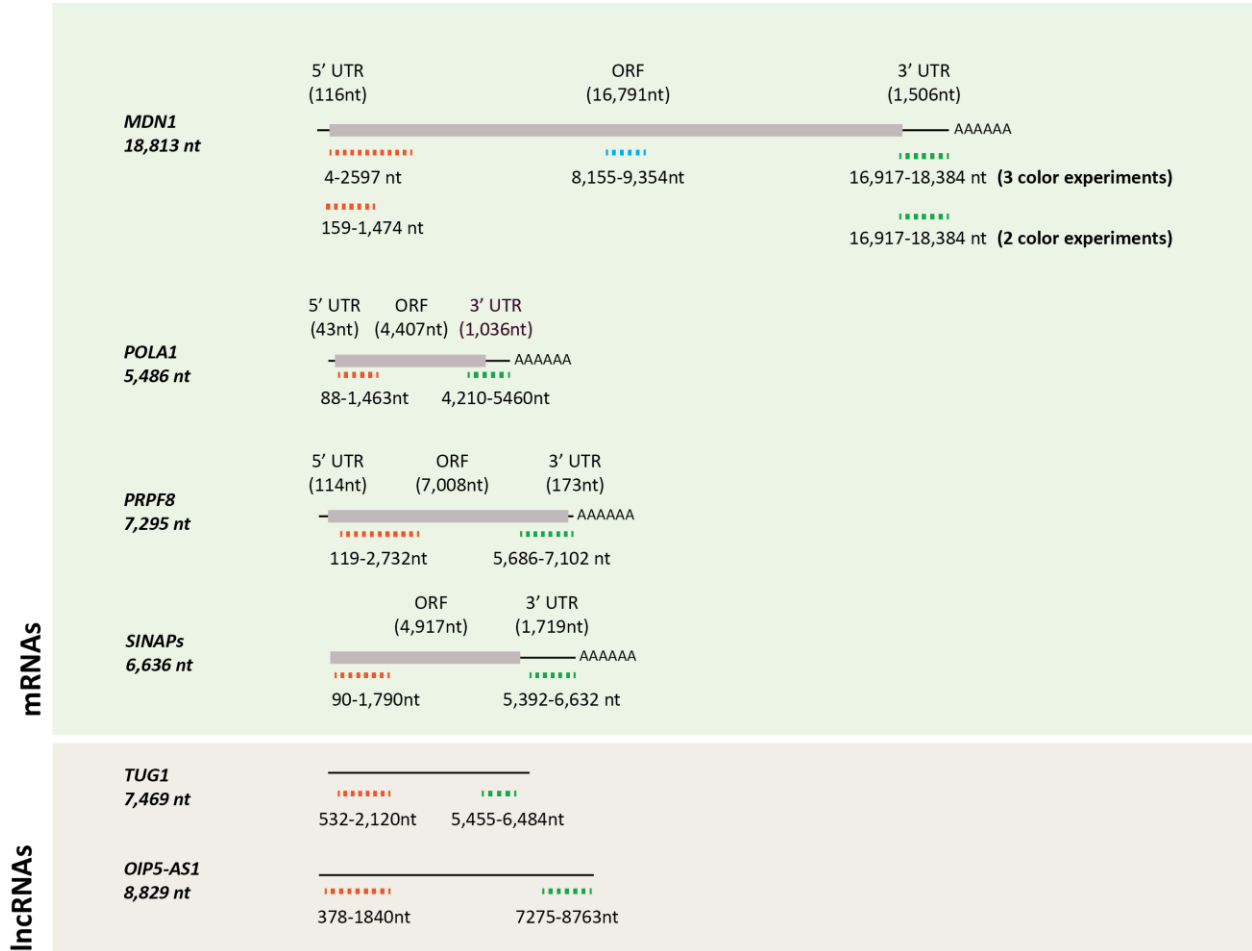

Adivarahan et al. Figure S1

**Figure S1: Positions of smFISH probes used in this study.** Cartoons illustrating the positions of the probes used for the different genes used. See Supplemental Table 1 for probe sequences. The transcripts sequences were obtained from ensembl – MDN1 (ENST00000369393), POLA1 (ENST00000379068), PRPF8 (ENST00000304992), TUG1 (ENST00000644773) and OIP5-AS1 (ENST00000500949)

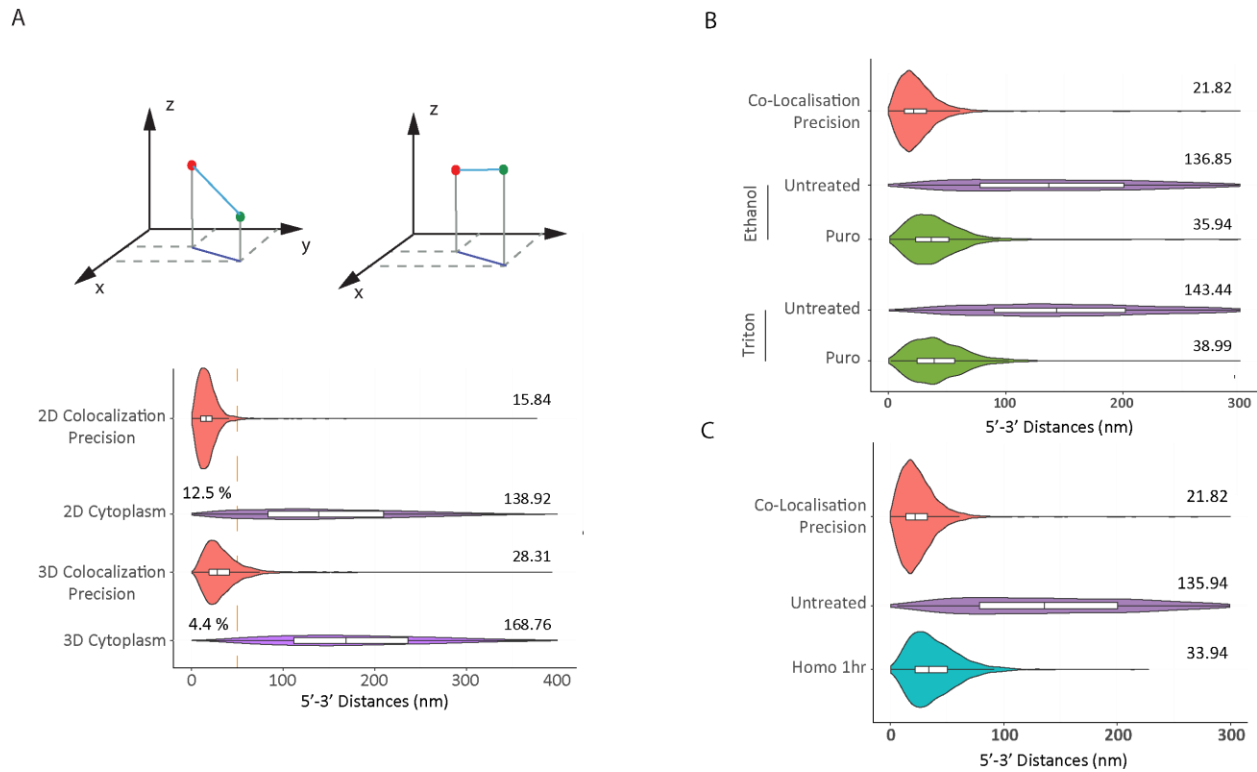

Adivarahan et al. Figure S2

**Figure S2: 5'-3' distances measured in 2D and 3D and upon treatment with translation inhibitors** (A) Cartoon illustrating how 2D projection alters 5'-3' distances measured (above) and violin plots showing distance distribution of co-localization precision and 5'-3' distances for MDN1 mRNAs calculated in 2D and 3D. Dotted line delineates the percentage of MDN1 mRNA with 5'-3' distances less than 50nm. (B) Violin plots showing distance distribution of co-localization precision and 5'-3' distances for MDN1 mRNAs in cells permeabilized with either Ethanol or TritonX-100, (C) Violin plots showing distance distribution of co-localization precision and 5'-3' distances for MDN1 mRNAs determined by Gaussian fitting from untreated and homoharringtonine (1hr) treated cells.

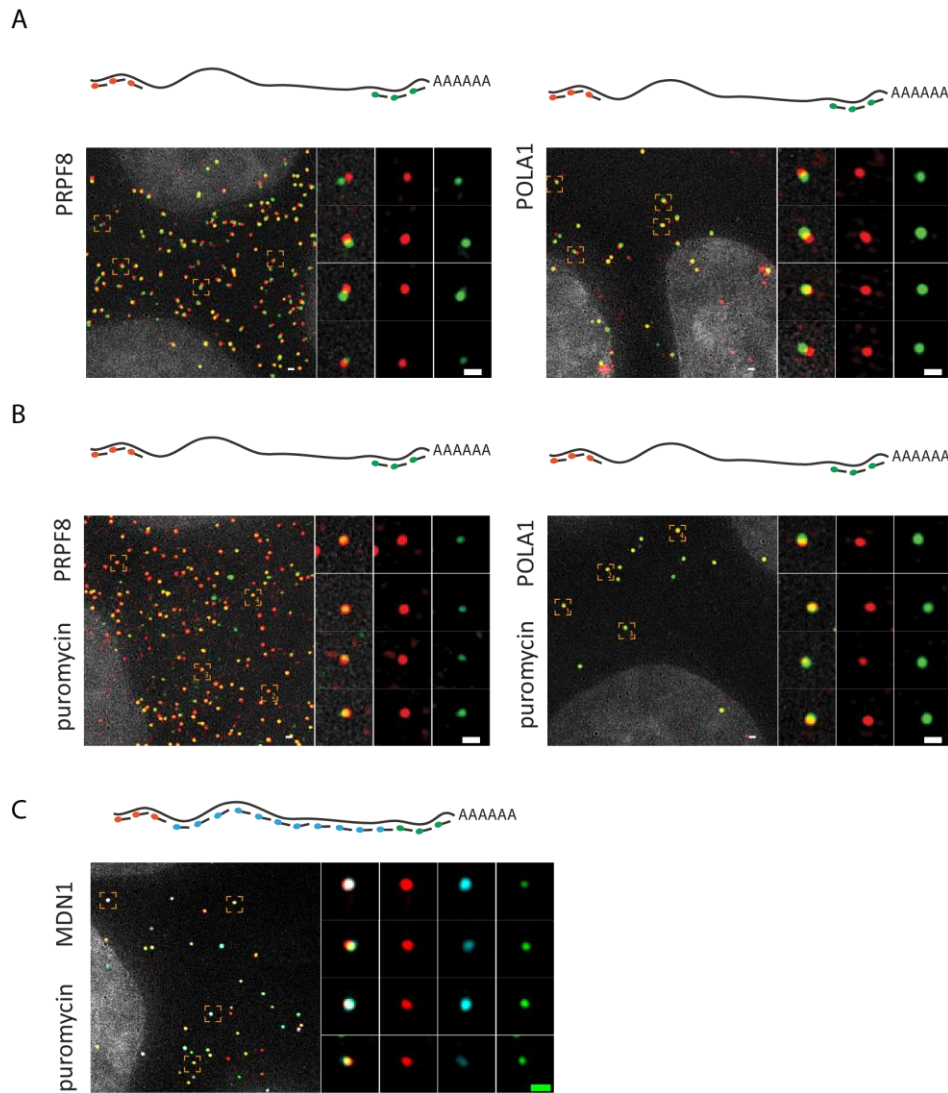

Adivarahan et al. Figure S3

**Figure S3: Visualizing mRNP conformation of single POLA1, PRPF8 and MDN1 mRNAs.** (A and B) smFISH images using probes hybridizing to the 5' and 3' ends of PRPF8 and POLA1 mRNAs in paraformaldehyde fixed HEK293 cells, either untreated (A) or treated with puromycin (10 min, 100  $\mu$ g/ml) (B). (C) smFISH using 5' (red), 3' (green), and tiling (cyan) for MDN1 mRNA in paraformaldehyde fixed HEK293 cells treated with puromycin (10 min, 100  $\mu$ g/ml). Nuclei are visualized by DAPI staining (grey). Magnified images of individual RNAs marked by dashed squares are shown on the right. Scale bars, 500 nm.

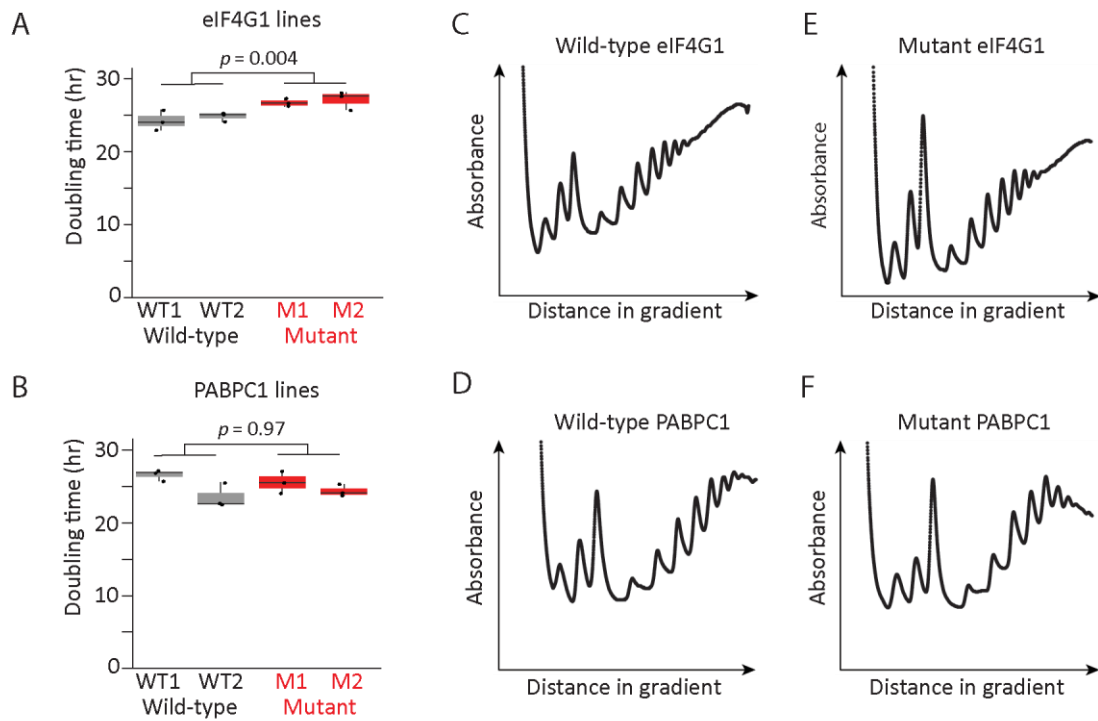

Adivarahan et al. Figure S4

**Figure S4: Close fraction of mRNP 5'-3' distances are not a result of eIF4G-PABPC1 interaction.** (A) Doubling time for eIF4G1 CRISPR-edited lines. Shown are the doubling times calculated for three independent biological replicates for two independent wild-type and mutant eIF4G1 lines. (B) As in (A), except for PABPC1 CRISPR-edited lines. (C–F) Polysome profiles for wild-type eIF4G1 (C), wild-type PABPC1 (D), mutant eIF4G1 (E), and mutant PABPC1 (F) lines.

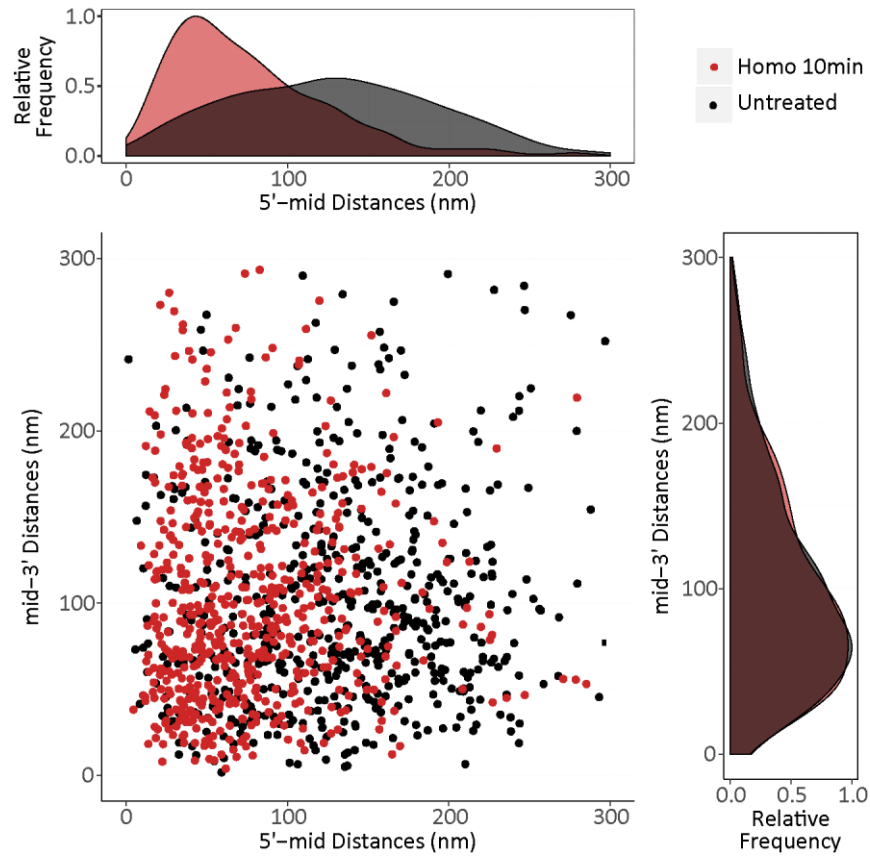

Adivarahan et al. Figure S5

**Figure S5: Compaction of the 5' end is altered upon a pulsed homoharringtonine treatment for 10min.** Scatter plot showing 5'- mid and mid-3' distances for individual cytoplasmic MDN1 mRNAs from untreated cells (black) and cells treated with homoharringtonine (100 $\mu$ g/ml, 10min) (red). Frequency distribution are shown on top and on the right.



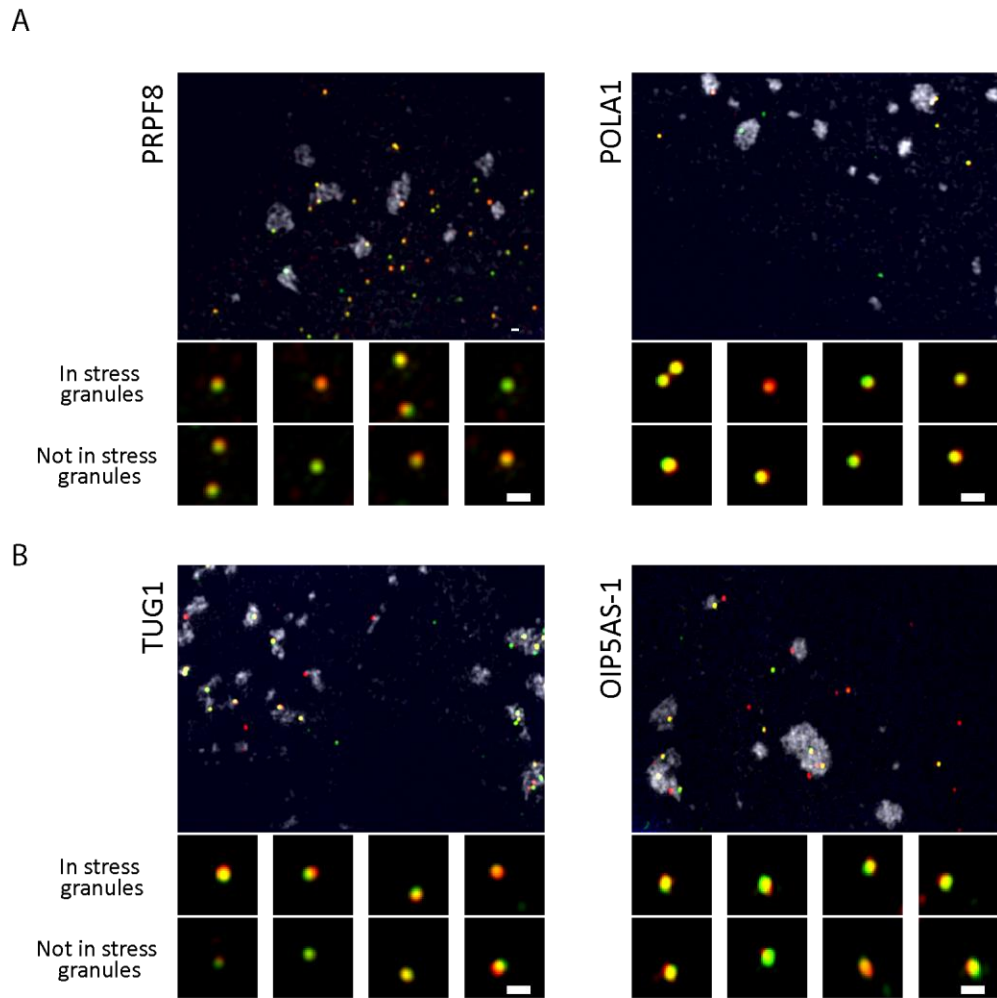

Adivarahan et al. Figure S6

**Figure S6: mRNA and lncRNA compaction and accumulation in stress granules.** smFISH visualizing 5' and 3' ends of PRPF8 and POLA1 mRNAs (A) or TUG1 and OIP5-AS1 lncRNAs (B) in U2OS cells treated with arsenite (1 hour, 2 mM). Only a selected cytoplasmic region of cells is shown. Stress granules are visualized using an oligo dT probe (grey). Magnified images of individual RNAs localized inside or outside of stress granules are shown on the bottom of the images. For POLA1 and OIP5-AS1, not all magnified single RNAs shown in the bottom are from the corresponding image above. Scale bars, 500 nm.

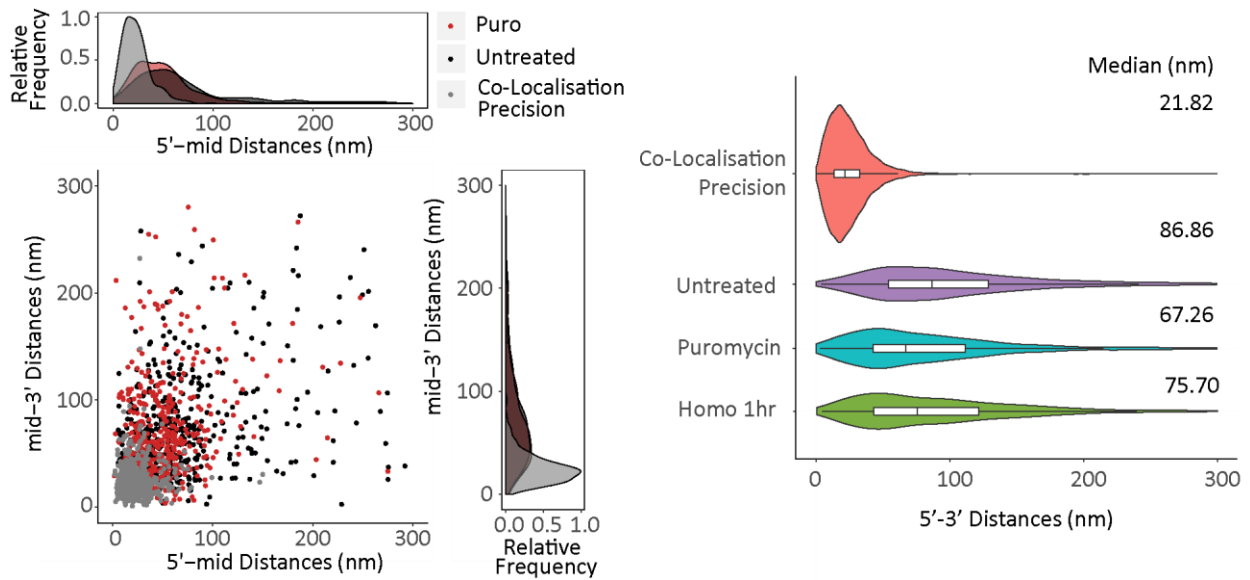

Adivarahan et al. Figure S7

**Figure S7: Compaction of nuclear MDN1 mRNA is not altered upon puromycin or homoharringtonine treatment. (Left)** Scatter plot showing 5'- mid and mid-3' distances for individual nuclear MDN1 mRNAs from untreated cells (black) and cells treated with puromycin (100µg/ml, 10min) (red). Co-localization precision is shown in grey. Frequency distribution are shown on top and on the right. **(Right)** Violin plots showing distance distribution of co-localization precision and 5'-3' distances for MDN1 mRNAs determined by Gaussian fitting from untreated, puromycin (100µg/ml, 10min) or homoharringtonine (100µg/ml, 1 hour) treated HEK293 cells. White box plot inside the violin plot shows first quartile, median and third quartile. Median distances are shown on the right.

## Tables

**Table S1:** Primers used for making CRISPR/Cas9 cells lines

| Name                                    | Sequence (5'-3')                                                    | Purpose                                                               |
|-----------------------------------------|---------------------------------------------------------------------|-----------------------------------------------------------------------|
| PABPC1 M161A<br>gRNA 1 Fw               | CACCGAATCTGTTAGCCATCTAAC<br>C                                       | Guide RNA targeting PABPC1;<br>annealed and ligated into pX330        |
| PABPC1 M161A<br>gRNA 1 Rev              | AAACGGTTAGATGGCTAACAGAT<br>T C                                      |                                                                       |
| PABPC1 region Fw<br>NotI                | GCGCACTAGCGGCCGCGAGGAAG<br>CGTTCAACTGTGA                            | To amplify 5' arm region of<br>PABPC1                                 |
| PABPC1 Not I 5' arm<br>Rev guide 1 XhoI | GCGCACTAGCGGCCGCCTCGAGA<br>CCTGGATATTTGTGAAATAAAG                   |                                                                       |
| PABPC1 BamHI 3' arm<br>Fw guide 1       | CGCGGATCCTAGATGGCTAACAG<br>ATTGTCTCTC                               | To amplify 3' arm region of<br>PABPC1                                 |
| PABPC1 region Rev<br>BamHI              | CGCGGATCCTTGGTCAGGCTGGTC<br>TCAA                                    |                                                                       |
| PABPC1 mutation Fw                      | GAAAGAGCTATTGAAAAAATGAA<br>TGGAGCGCTCCTAAATGATCGCA<br>AAGTATTTGTTGG | Internal primers for stitch PCR<br>to make PABPC1 mutation            |
| PABPC1 mutation Rev                     | CCAACAAATACTTTGCGATCATT<br>AGGAGCGCTCCATTCATTTTTTCA<br>ATAGCTCTTTC  |                                                                       |
| PABPC1 region Fw                        | GGCGAGAGATTGCGTCAAGAA                                               | Screening for puromycin<br>cassette insertion/excision                |
| PABPC1 region Rev                       | CCCTGGTAACAGGCATTTGTGAG                                             |                                                                       |
| PABP seq Fw1                            | GCAATATGGAATTCTTTTATATG                                             | To sequence PCR products from<br>PABPC1 mutant cell line<br>screening |
| PABP seq Fw2                            | GGAAGTGTGCAGTAATGGATATC                                             |                                                                       |
| PABP seq Rev1                           | CAATCTTGTCGCCCAGACTGG                                               |                                                                       |
| eIF4G1 mutant gRNA<br>1 Fw              | CACCGTGCTGCTGGGACATTGTGC                                            | Guide RNA targeting eIF4G1;<br>annealed and ligated into pX330        |
| eIF4G1 mutant gRNA<br>1 Rev             | AAACGCACAATGTCCCAGCAGCA<br>C                                        |                                                                       |
| eIF4G1 5' HR Arm Fw<br>NotI             | GCGCACTAGCGGCCGC<br>GAGACAGGAAGTAGACTCAAG                           | To amplify 5' arm region of<br>eIF4G1                                 |
| eIF4G1 5' HR Arm Rev<br>NotI XhoI       | GCGCACTAGCGGCCGC CTCGAG<br>CAATGTCCCAGCAGCACCTGACC                  |                                                                       |
| eIF4G1 3' HR Arm Fw<br>BamHI            | CGC GGATCC<br>TGCCGGAAAGAGCAGTACTTG                                 | To amplify 3' arm region of<br>eIF4G1                                 |
| eIF4G1 3' HR Arm Rev<br>BamHI           | CGC GGATCC<br>GGCACCTATTCTGGGCACC                                   |                                                                       |
| eIF4G1 mutation Fw                      | TGCAGCCGCTGCCGCGGGAGCAA<br>TCTGGGGTGGCTGGTTC                        | Internal primers for stitch PCR<br>to make eIF4G1 mutation            |
| eIF4G1 mutation Rev                     | CGCCAGTGGGAAACTGCTGCACCCCTTGG<br>GCTGGATAGTAGG                      |                                                                       |

|                   |                        |                                                                |
|-------------------|------------------------|----------------------------------------------------------------|
| eIF4G1 region Fw  | GTAGTCGCACAGTCTTGGCTC  | Screening for puromycin cassette insertion/excision            |
| eIF4G1 region Rev | GAGTCCAGGGCAGAACAGAC   |                                                                |
| 4G seq Rev1       | CACCCCTCGTAGGCAGGCACTC | To sequence PCR products from eIF4G mutant cell line screening |
| 4G seq Fw 1       | CAGAGTATGTGTGTACATGTTG |                                                                |
| 4G seq Rev2       | CTTCCTCGCTAGGCACTTCAG  |                                                                |
| 4G seq Rev 3      | CCAGCAGTCCCCAAGTCAGTGG |                                                                |

**Table S2:** List of probes used

|         |                       |          |                       |
|---------|-----------------------|----------|-----------------------|
| MDN1 5' | tcgttcttggtcgattaa    | POLA1 3' | tgtacagggactgtcagaa   |
| MDN1 5' | taaggtactcaggacacact  | POLA1 3' | taccggtaaagcacagctg   |
| MDN1 5' | cacagtacagtcttatcca   | POLA1 3' | gtgcacactccgcatcaaaa  |
| MDN1 5' | agcaaatccaaaaggagagg  | POLA1 3' | tctcatgatcggtagtaagt  |
| MDN1 5' | ttgaaagactgggatgtgt   | POLA1 3' | ctgtagtctgcagaacttt   |
| MDN1 5' | gcatctgaactctctaggaa  | POLA1 3' | ctctgctgtgttcttgagtt  |
| MDN1 5' | gtgctcttcattacacagg   | POLA1 3' | tagccacttcgggacaagaa  |
| MDN1 5' | cctcaacctgaaatggatca  | POLA1 3' | tttgctcagattcactcgg   |
| MDN1 5' | aaaaccaaggccttctccaa  | POLA1 3' | ttaggatttcacggcacaac  |
| MDN1 5' | aaaggagacttctggattg   | POLA1 3' | cttggttactcctgggattc  |
| MDN1 5' | tcagacgaacaagatgtcc   | POLA1 3' | ggaagctgggattttcaac   |
| MDN1 5' | accgacacataagactaag   | POLA1 3' | caagggagaaacagatgctg  |
| MDN1 5' | gaagacttttcagacagac   | POLA1 3' | acacaacatgagacacagt   |
| MDN1 5' | acagcattctgagaagcaac  | POLA1 3' | gactcaacattttgcagcc   |
| MDN1 5' | tcctattggtccttccaaca  | POLA1 3' | ctcagaaccgggtcttcag   |
| MDN1 5' | cctgtcactgcagctaaata  | POLA1 3' | gctactctcaatccaagtag  |
| MDN1 5' | aagctggactttgagaagct  | POLA1 3' | gcctggggtcacttacattc  |
| MDN1 5' | acatctgtgcagcgatacat  | POLA1 3' | cataggctaaaggccctgag  |
| MDN1 5' | atatectccagaaggatcca  | POLA1 3' | ttcagtcaggctctgagaag  |
| MDN1 5' | aagagctctccattctccaa  | POLA1 3' | tgaaaaagcaaacgtcagc   |
| MDN1 5' | aaatccaggtgccatttca   | POLA1 3' | ttagaccgggttaattggc   |
| MDN1 5' | caactacccccgcaggaaag  | POLA1 3' | actcctggatggctggagaa  |
| MDN1 5' | agcaagaagtgtccatgac   | POLA1 3' | agacaagactgaaaaggaca  |
| MDN1 5' | caagaacctgcccactcac   | POLA1 3' | agtgcgaaggcttctaaatct |
| MDN1 5' | cgatcttgaggtgtccacac  | POLA1 3' | gagcaattcaacaacaagc   |
| MDN1 5' | aatggcttcggcattccttt  | POLA1 3' | cagtgtgtgtctgttgact   |
| MDN1 5' | gttcacatgagatcatggttg | POLA1 3' | atgtgagtgtaaaacacctg  |
| MDN1 5' | gtttgctcatcgacacacat  | POLA1 3' | gcactttctatttaaggggc  |
| MDN1 5' | gacatcaggatggttaccaa  | POLA1 3' | ccctacacatgttaatggat  |
| MDN1 5' | aatatctcagggcaaacggg  | POLA1 3' | tgaatacaacacagtgatecc |
| MDN1 5' | tacgtccatagcgtactgga  | POLA1 3' | ggccaattaagcatccctct  |
| MDN1 5' | gcagaaactgaaggctgct   | POLA1 3' | agaaaaaatagcaagcgcc   |
| MDN1 5' | cggaacacagactgctcctg  | POLA1 3' | agacggctcctattgtgaaga |
| MDN1 5' | aagggtgcatggcttctgag  | POLA1 3' | aaatacattttgctgctgcc  |
| MDN1 5' | acaattggctgtataccagc  | POLA1 3' | agagaggaagactgccata   |
| MDN1 5' | acaccacaacagctgtcac   | POLA1 3' | cagcataaattgtacaagggg |
| MDN1 5' | tcttactgtcagtctgatct  | POLA1 3' | agaagaaggcacaacatact  |
| MDN1 5' | gaagaactcctattaccacc  | POLA1 5' | aactccctgaatctgacaga  |

|             |                      |             |                       |
|-------------|----------------------|-------------|-----------------------|
| MDN1 5'     | ctgccacacaaactctccag | POLA1 5'    | ttgattttttctcgccgg    |
| MDN1 5'     | cagaaaccacgtctaagggg | POLA1 5'    | tttctagggcttctggcgc   |
| MDN1 5'     | caatttcctccacagctcaa | POLA1 5'    | ccagcttttagccttttcag  |
| MDN1 middle | aagcagcaagattgaccaca | POLA1 5'    | taaacacctgtgaagtctc   |
| MDN1 middle | ggactagtgcatacacaagt | POLA1 5'    | cctgaaccagcttccaatac  |
| MDN1 middle | actggcatcagacaccattc | POLA1 5'    | caatccagtcatactctgg   |
| MDN1 middle | accgcagagaacctaaagtc | POLA1 5'    | ggcatcatcttcaaggctat  |
| MDN1 middle | ggcatctacttttactgtgt | POLA1 5'    | tctgtctttattgcgtgct   |
| MDN1 middle | tgcaatggagggcaagaag  | POLA1 5'    | cactgcgagcttcttaccat  |
| MDN1 middle | ctggtggaccagatgtttta | POLA1 5'    | tctgcagttttcttccagc   |
| MDN1 middle | aattcatcagaagtcggggg | POLA1 5'    | accatcctggacaagtcta   |
| MDN1 middle | ctgagacagtctgaactct  | POLA1 5'    | cctgtagaatgacacctagc  |
| MDN1 middle | tcccagacaattctgaata  | POLA1 5'    | tcagtatcattacaggtggt  |
| MDN1 middle | cttctttataccagcgaagc | POLA1 5'    | tgaagctccaatggatcttt  |
| MDN1 middle | aaacggctgcccaggaact  | POLA1 5'    | tgtgcacagagaaaggattc  |
| MDN1 middle | ccaccagcttgctcttaaaa | POLA1 5'    | gggaagcaattttctctgaa  |
| MDN1 middle | ggaccttcagttgtgaaaaa | POLA1 5'    | agttaatggaggctcctttc  |
| MDN1 middle | ctgatggcaaggactttgtt | POLA1 5'    | cagcacgtttaagaggaaca  |
| MDN1 middle | agacggtaatgtcttctcg  | POLA1 5'    | tctcgacctgtacatcatcg  |
| MDN1 middle | ccactgagaagcaaccactt | POLA1 5'    | tgactcctgctcttctctg   |
| MDN1 middle | cttgcaggagacttttcttt | POLA1 5'    | ggctcatcaaaagtcaccatc |
| MDN1 middle | atctgctctgaggatcagtc | POLA1 5'    | agccataggctccaggtcca  |
| MDN1 middle | ttcatctaggctgacatctt | POLA1 5'    | tctctttgtcccaagccttg  |
| MDN1 middle | ctgagcatgcacaaaattct | POLA1 5'    | ttgtttcactctctctgctg  |
| MDN1 middle | cctttggcttccagttctaa | POLA1 5'    | agtaggacacggctccctttc |
| MDN1 middle | ctccagaaaaccaagtgaga | POLA1 5'    | catccgggagaaaacttctct |
| MDN1 middle | aggaagcttcatcatgcttt | POLA1 5'    | tgatcaatgtccaacaaga   |
| MDN1 middle | gtcaagtctggatgggacag | POLA1 5'    | tgcactgagaaaactgctatc |
| MDN1 middle | tctgtgtgaggtgattacg  | POLA1 5'    | gactggaatccactgaaact  |
| MDN1 middle | attgcaggccacaactgaac | POLA1 5'    | gccccctttaccaatgggag  |
| MDN1 middle | ttgtaccgcaaagcatag   | POLA1 5'    | agtggaaatactgttctca   |
| MDN1 middle | gtgccataaaatcagctgtc | POLA1 5'    | ggttggtgtactgatcctc   |
| MDN1 middle | ctgcattctctgagacaagc | POLA1 5'    | ctcggctgattcaatccaaa  |
| MDN1 middle | tttatctggggtgtgtgatt | POLA1 5'    | atgacacaacagctcacatg  |
| MDN1 middle | agatgaggtgacttatctcc | POLA1 5'    | agcgttcgctcgatattttt  |
| MDN1 middle | acaggtgtgtgataagaca  | POLA1 5'    | gtttctttccccgtatttag  |
| MDN1 middle | atctcgaagctcttgaggtg | POLA1 5'    | gcatagttctttccactgg   |
| MDN1 middle | tgatgatgcagcaaggacca | POLA1 5'    | ctggacatcaggtatctca   |
| MDN1 middle | aatttctcaggagacacct  | POLA1 5'    | aatcttgaggaagctgtggc  |
| MDN1 middle | ataactcggaccacaaagat | POLA1 5'    | agatgtgtgtgcccacaata  |
| MDN1 middle | agtactgctccagaaagaca | OIP5-AS1 5' | acgggaaagtaactgggtaa  |

|             |                       |             |                       |
|-------------|-----------------------|-------------|-----------------------|
| MDN1 middle | agfacctctggatttgggtc  | OIP5-AS1 5' | gaagtgatagccacatttca  |
| MDN1 middle | ggcaaagggttccacattag  | OIP5-AS1 5' | ccaaatcatggaggtaatgt  |
| MDN1 middle | tccaaaacagacttgggtgc  | OIP5-AS1 5' | aagaaaagtggcctttcca   |
| MDN1 middle | tgggtctattgagattgccg  | OIP5-AS1 5' | ctctctgtgtgaattga     |
| MDN1 middle | tcaaagcagcacttagagaa  | OIP5-AS1 5' | agcaggataactggaatcct  |
| MDN1 middle | tctccagctgctggtaaga   | OIP5-AS1 5' | cttcttctcctggagatg    |
| MDN1 3'     | aagtctcactttggactctt  | OIP5-AS1 5' | agcaaaagaccatgtgagt   |
| MDN1 3'     | aatgtgaccttctgaccaca  | OIP5-AS1 5' | agccttctgcttgcAAAatg  |
| MDN1 3'     | aaaaggggagcacttgggtaa | OIP5-AS1 5' | gcacctgtttcaaatgaaac  |
| MDN1 3'     | agcattctgtaggctgtaag  | OIP5-AS1 5' | attcacaataaccaccctt   |
| MDN1 3'     | tggataaaaacctcagccc   | OIP5-AS1 5' | cttcttagtcttcttctt    |
| MDN1 3'     | actcttctctagttagcagt  | OIP5-AS1 5' | ccctgaagtcattcactt    |
| MDN1 3'     | cttccaaggcagggagaag   | OIP5-AS1 5' | gtggctgaaactggaagaca  |
| MDN1 3'     | aagaaaacaggcagctgggc  | OIP5-AS1 5' | ctcaactgtgcttatcatgg  |
| MDN1 3'     | acaaggactgtcagagctcc  | OIP5-AS1 5' | atttggaaattactgctgca  |
| MDN1 3'     | aaaagggcagctcccttag   | OIP5-AS1 5' | ttttagtatcttcacgtca   |
| MDN1 3'     | gcaaggcagagcttagaaca  | OIP5-AS1 5' | caggatgagccaggatgtaa  |
| MDN1 3'     | ttgggcacacactatgggc   | OIP5-AS1 5' | gttctattcagtaaactca   |
| MDN1 3'     | ctgtcttggccacttgacag  | OIP5-AS1 5' | ttttgtttaaattgggcct   |
| MDN1 3'     | cctcactctccagaaacg    | OIP5-AS1 5' | aactcctctatgtccaaagt  |
| MDN1 3'     | tctaagagaaggtagtctct  | OIP5-AS1 5' | ggaaaattctctcactctcc  |
| MDN1 3'     | ctataatgtccagttgcttt  | OIP5-AS1 5' | catgagggtttttgcttct   |
| MDN1 3'     | ttttatagatgacctgggc   | OIP5-AS1 5' | caccataaagtcatgatggca |
| MDN1 3'     | ttttacacagcccaaggat   | OIP5-AS1 5' | gggttcaggaagagttaat   |
| MDN1 3'     | gaggatactgaaaagccact  | OIP5-AS1 5' | caaacatccaagtatccacc  |
| MDN1 3'     | cattgcatagtctcccgaag  | OIP5-AS1 5' | cctttcagcctagaatca    |
| MDN1 3'     | ataaaggggcaatcaccttc  | OIP5-AS1 5' | ctggggaaagtacctgagtc  |
| MDN1 3'     | tacaacaacagggaccatgg  | OIP5-AS1 5' | tgatgagaaagttcagtcct  |
| MDN1 3'     | agtgtgaggaatcactcttc  | OIP5-AS1 5' | tgggaacattgcttctgagg  |
| MDN1 3'     | tggctcagctcagcttga    | OIP5-AS1 5' | cacgatgaccaaccacaag   |
| MDN1 3'     | cgttcttcccagaatgag    | OIP5-AS1 5' | ttctatttgaggttcttt    |
| MDN1 3'     | atagatggagctgctgagtt  | OIP5-AS1 5' | ttctacgacagtctgttctt  |
| MDN1 3'     | atcagtttcttgcactgga   | OIP5-AS1 5' | gctgatttggaaagcaagac  |
| MDN1 3'     | ggccaagtaaaaactgccta  | OIP5-AS1 5' | acaatacatacaatgtctct  |
| MDN1 3'     | caagtattcagcactgcttt  | OIP5-AS1 3' | accacagatctgtcagtatt  |
| MDN1 3'     | agtagaacagacacacagt   | OIP5-AS1 3' | gccaaacctcaaggataa    |
| MDN1 3'     | atcatgacatactgcttaca  | OIP5-AS1 3' | gctttagcaagaaattgca   |
| MDN1 3'     | tcgacagcttcacagtgtaa  | OIP5-AS1 3' | aagtttctctgtttaacct   |
| MDN1 3'     | atctgtgtctttgatgacca  | OIP5-AS1 3' | gcaaggattttctcttagtg  |
| MDN1 3'     | tacatgcttgggacacttg   | OIP5-AS1 3' | gcaaggattttctctattg   |

|             |                       |             |                       |
|-------------|-----------------------|-------------|-----------------------|
| MDN1 3'     | aagatcagtccecctagcata | OIP5-AS1 3' | gtcaggaattttctcaagga  |
| MDN1 3'     | ctgactgactgatccagcag  | OIP5-AS1 3' | gtcacaatcactgtactt    |
| MDN1 3'     | gcacagcatcaactagtaac  | OIP5-AS1 3' | tgaatgccattttacgtca   |
| MDN1 3'     | gaagtaggaggggatcatgt  | OIP5-AS1 3' | tttagctgtttcagacat    |
| MDN1 3'     | cctttgtagtaagagcaaca  | OIP5-AS1 3' | acctgaatgtgctttgtga   |
| MDN1 3'     | cagcctaccatggacataaa  | OIP5-AS1 3' | tcccaaagtattttagca    |
| MDN1 3'     | ctgcaaagccagcatattat  | OIP5-AS1 3' | gtfaccattccactttatc   |
| MDN1 3'     | gcctcctataaggetacac   | OIP5-AS1 3' | ttcaattctgaacctgga    |
| MDN1 tiling | acacacactgcaagctgctc  | OIP5-AS1 3' | accaaacatcacagtcacaa  |
| MDN1 tiling | ctggagcagccaagttaatc  | OIP5-AS1 3' | ggatatgacatctcacttca  |
| MDN1 tiling | agagtgagcgtgaatgtg    | OIP5-AS1 3' | tgctatcaagtaattgggga  |
| MDN1 tiling | ccctgtcaagctgtgtaag   | OIP5-AS1 3' | gttcttaactttactggct   |
| MDN1 tiling | ttcacggttatcatccaaca  | OIP5-AS1 3' | gccttagtggataatcgga   |
| MDN1 tiling | tctgtgtttctgttactag   | OIP5-AS1 3' | tgatgtctggttcccaaaa   |
| MDN1 tiling | agttacactcaatgtggat   | OIP5-AS1 3' | gatttagacttcatggaga   |
| MDN1 tiling | ctcagtcacacgatatggc   | OIP5-AS1 3' | agatacctattctgacttta  |
| MDN1 tiling | ccatatttctgtaaaccggt  | OIP5-AS1 3' | acctgaatactgtcagtaac  |
| MDN1 tiling | taaatctcacggcttgtgc   | OIP5-AS1 3' | tgacatatcacaagggaga   |
| MDN1 tiling | attattctgtgtaggacag   | OIP5-AS1 3' | tcctggggagaaaatattt   |
| MDN1 tiling | tgcactgagtgcatagtctg  | OIP5-AS1 3' | gtattaccagaatacctttc  |
| MDN1 tiling | ccccaaaatctctgctttt   | OIP5-AS1 3' | tgccaagactgttactgttt  |
| MDN1 tiling | ctgttctaaaggattctga   | OIP5-AS1 3' | gaaatgggtcgttttgtga   |
| MDN1 tiling | aatgactgggtcaggagcaa  | OIP5-AS1 3' | attctacaaggcagtaggt   |
| MDN1 tiling | tcatctgcacacacttcatg  | OIP5-AS1 3' | gtaaacacagtgagcaactc  |
| MDN1 tiling | caactgcgtaagcttcacac  | OIP5-AS1 3' | tgagaaataggaggacagc   |
| MDN1 tiling | tcaaatgtgccatggctatg  | OIP5-AS1 3' | acgttatacacaatgggtgc  |
| MDN1 tiling | gcaggtactggacaattagt  | OIP5-AS1 3' | aagcaagctgcctttgtaa   |
| MDN1 tiling | aggctctgtctaaactcagc  | OIP5-AS1 3' | acccccaaagatgcatagatt |
| MDN1 tiling | agccatttaactctgagcat  | OIP5-AS1 3' | ccaacttttttaacagtcc   |
| MDN1 tiling | gcggtatattctggctaaa   | TUG1 5'     | cactaaggcggcataaggag  |
| MDN1 tiling | ggactagtgcatacaaaagt  | TUG1 5'     | acccccacacattgatagg   |
| MDN1 tiling | actggcatcagacaccattc  | TUG1 5'     | ttgtgaagggtcccaaatga  |
| MDN1 tiling | gttctaaacactgagcatgc  | TUG1 5'     | ggactcaaacagggtctcaa  |
| MDN1 tiling | aaccaagtgagagtcctttg  | TUG1 5'     | agaaacagctcacatatccc  |
| MDN1 tiling | ggcaaagggtccacattag   | TUG1 5'     | aacccccgaatatccattatg |
| MDN1 tiling | tccaaaacagacttgggtgc  | TUG1 5'     | aatagaagccaagcagggga  |
| MDN1 tiling | gaggtgagcaactggcagag  | TUG1 5'     | ccccatggtgaaagaaaagg  |
| MDN1 tiling | ttaccaacaaagtgggtgca  | TUG1 5'     | attgtaccatatgcatcagc  |
| MDN1 tiling | tttagaaggctctgggttac  | TUG1 5'     | tcctaattgtagctgcttta  |
| MDN1 tiling | cggaactgggtgtgactg    | TUG1 5'     | ggatgtacagaacacatcc   |



|                    |                      |         |                       |
|--------------------|----------------------|---------|-----------------------|
| MDN1 tiling        | acatgtctgaagagctgcag | TUG1 5' | gttgacgggccaaggataa   |
| MDN1 tiling        | ttctctgggctatgcgttc  | TUG1 5' | accagtacaagcagcagata  |
| MDN1 tiling        | tagaagtcataagggccatc | TUG1 5' | tatggtcataagagtcaga   |
| MDN1 tiling        | tgctctggaacattgggat  | TUG1 5' | atggatgacaacctggctg   |
| MDN1 tiling        | gcaacatcaaggtcatctgt | TUG1 5' | cctagacatgtaaagtagga  |
| MDN1 tiling        | aagtcgcatggaactctc   | TUG1 5' | ctattcaccaccaaccacac  |
| MDN1 tiling        | ctgacaccactctggaattg | TUG1 5' | ctggcagcaccatgtaaaaa  |
| MDN1 tiling        | ttggcaagcgacgcagaag  | TUG1 5' | cgtgcaccattaatagctg   |
| MDN1 tiling        | ggtgctagtctgcgttaag  | TUG1 5' | tgagcccgttgctaaaagt   |
| MDN1 tiling        | aatgtgctgagaacctctg  | TUG1 5' | aattccatgccaggctcagt  |
| MDN1 tiling        | cagctgactccaggtattg  | TUG1 5' | aaaaacccaacatcttca    |
| MDN1 tiling        | caaaggtgatctgtttccg  | TUG1 5' | ctactgattttgaggttccg  |
| MDN1 tiling        | cataatcttctgtgggctt  | TUG1 5' | ttagctttgaaactctcca   |
| MDN1 tiling        | ttagatgtcctgattgcagt | TUG1 5' | agaacacaaggaggccaag   |
| MDN1 tiling        | cccttctgaaatgtatctc  | TUG1 5' | tcctagtattacacttcaa   |
| MDN1 tiling        | tcgcccttaatatcagattt | TUG1 5' | gcaaaaactggcatcttga   |
| MDN1 tiling        | ccacctcatttcacatag   | TUG1 5' | tttgttgataatggcctga   |
| MDN1 tiling        | ttcctgattgccatgtaag  | TUG1 5' | tgagcaccactccacaaaac  |
| MDN1 tiling        | ggccaactgggcaatgaaat | TUG1 5' | atgtgtttgtttcacttgc   |
| MDN1 tiling        | ttttcctggtgtgcttctg  | TUG1 5' | agcataactggctaacaatct |
| MDN1 tiling        | gtaactctgccacatctcag | TUG1 5' | tcctcgcctttaggaaaag   |
| MDN1 tiling        | gtgaaagaggcgtgtaag   | TUG1 5' | gtcatttctctggaagtgag  |
| MDN1 tiling        | gagcagctgcaaacatgttg | TUG1 5' | accaacacttttttctcc    |
| MDN1 tiling        | aactgatgttctgcgagagc | TUG1 5' | gaggtacatccggtttaat   |
| MDN1 5' additional | atgactgtttagcggtcgat | TUG1 5' | tcaccacagcttaagtctt   |
| MDN1 5' additional | ccaggtgaattttggccaa  | TUG1 5' | ttctgctgaggaagcatct   |
| MDN1 5' additional | cagttctcttattccaggt  | TUG1 3' | gagtgacagggtcagcagag  |
| MDN1 5' additional | gtttctctccagtaagttgg | TUG1 3' | gtttaggagtctatgctaca  |
| MDN1 5' additional | gaactatcactccaagagt  | TUG1 3' | cctcaatcagacttgaggtt  |
| MDN1 5' additional | aacttctcaggtgctgtt   | TUG1 3' | acttctcagctcaggagaagg |
| MDN1 5' additional | ctcaagggttggtctttgt  | TUG1 3' | tttctgctcatctgccaaa   |
| MDN1 5' additional | gggcaatcctattacaccaa | TUG1 3' | agtcaggatcatcagctttc  |
| MDN1 5' additional | ctcagaaagcattgctgtga | TUG1 3' | ggatacagttttctgatctt  |
| MDN1 5' additional | gctccaataactctgcca   | TUG1 3' | gggtaatccatagggcttat  |
| MDN1 5' additional | ttgtctgacacactgcaa   | TUG1 3' | gttttactctgggtactca   |
| MDN1 5' additional | atggtagagttttgccagt  | TUG1 3' | ccagcagatcaataaggaag  |
| MDN1 5' additional | cctgtaatgtgagccaagta | TUG1 3' | gccagaatatgatctggaag  |
| MDN1 5' additional | attgacaacctcaaacggt  | TUG1 3' | agaaaggccagccataccaa  |
| MDN1 5' additional | gcaagtctgcagtatcactt | TUG1 3' | aatagacaagcagggtacct  |
| MDN1 5' additional | atgtccaccggtttataac  | TUG1 3' | aaaggcaggcaagagctgag  |

|                    |                       |          |                        |
|--------------------|-----------------------|----------|------------------------|
| MDN1 5' additional | gtaaggtagccaaataagc   | TUG1 3'  | gtctaattgcagcaacatgt   |
| MDN1 5' additional | aagagttcctcaaatgcctc  | TUG1 3'  | aattgactgtagtctcacg    |
| MDN1 5' additional | gccccagaacgtaagttt    | TUG1 3'  | aaatcctgtgtattgggc     |
| MDN1 5' additional | ctgtctgtaacaggctctgaa | TUG1 3'  | agggtggggtgtactatt     |
| MDN1 5' additional | ttagtctcaggagatcatgc  | TUG1 3'  | gaacattgagtcctagtggg   |
| MDN1 5' additional | agcagactgtgtacatgct   | TUG1 3'  | aagttgctggtaaggagta    |
| MDN1 5' additional | cactgtctttccatccttg   | TUG1 3'  | acatacaggaatagaggcct   |
| MDN1 5' additional | ccaaatgcttcccatttctc  | TUG1 3'  | aggttccagggtgctgaaaaat |
| MDN1 5' additional | ttgggatggttgagtctaa   | TUG1 3'  | aactgctgattcctccag     |
| PRPF8 5'           | ctcgataaggaaacactccg  | TUG1 3'  | agagaaatggacgcggcttt   |
| PRPF8 5'           | caattgctgccattttcgag  | TUG1 3'  | actcatttctgcactactga   |
| PRPF8 5'           | acttccgcttttctcatag   | TUG1 3'  | tctgtgtgtactggtgaatc   |
| PRPF8 5'           | tggtctcgaatgatcttct   | TUG1 3'  | tgctaggttgaactggtaca   |
| PRPF8 5'           | aacttctgttggtcatgct   | TUG1 3'  | acagtggaaacttttctct    |
| PRPF8 5'           | catgttctccaggagtttga  | TUG1 3'  | ctgtgaggcaatttgagtca   |
| PRPF8 5'           | attgacgaaggaaatggctc  | TUG1 3'  | acaactagccttctacatca   |
| PRPF8 5'           | gtagacaggttcaatgacc   | TUG1 3'  | aactgtcctgctgatctgaa   |
| PRPF8 5'           | tttctcggcgcatcataat   | TUG1 3'  | agtggctatgagctgagag    |
| PRPF8 5'           | ggaaaaagcctccttctgaa  | TUG1 3'  | ccacagttcaacacaagca    |
| PRPF8 5'           | cggctcctcatcatcaaaag  | TUG1 3'  | gtccaatagcatatgttggga  |
| PRPF8 5'           | ggatgtgtcagcatagtc    | TUG1 3'  | cctcaagaagtctgtaatcc   |
| PRPF8 5'           | ggtcatagaaccagtccaac  | TUG1 3'  | atgagagataagtttctct    |
| PRPF8 5'           | tggtaaagtgagccatttac  | TUG1 3'  | gtttcttcttgggtataaa    |
| PRPF8 5'           | cggtagagagctgacatcat  | TUG1 3'  | ttgaatggtaacagctggca   |
| PRPF8 5'           | agtctgtcaggagctgatta  | TUG1 3'  | agcttaatctctgcttaaga   |
| PRPF8 5'           | gacgtaaagaaggccttcaa  | PRPF8 3' | gtgacaatgatctgcttggg   |
| PRPF8 5'           | caggaatggcatattgagt   | PRPF8 3' | gtgggtccagcatgcccttc   |
| PRPF8 5'           | gtctcgaacaagaggttcaa  | PRPF8 3' | gggaagtcagtaagtgcac    |
| PRPF8 5'           | ctgccggatgataatctgt   | PRPF8 3' | ctccgatccttctgatgaaa   |
| PRPF8 5'           | tcttactactagtcgggata  | PRPF8 3' | cttgagacacgcctggaaag   |
| PRPF8 5'           | aagtagaaagctggcaagtc  | PRPF8 3' | tgagatccccgaattttcc    |
| PRPF8 5'           | gggagctcaaatcctcatc   | PRPF8 3' | ctggggctcagtggtttaa    |
| PRPF8 5'           | ccattggctgtattgtctgt  | PRPF8 3' | catagaggttgaagagaacc   |
| PRPF8 5'           | cttaagcagcttctggtagg  | PRPF8 3' | tgaatatgcttctgagccagt  |
| PRPF8 5'           | cttcttttgagccttagggg  | PRPF8 3' | cgcagaatcaggatgagacg   |
| PRPF8 5'           | cagctttgtgactgaaaga   | PRPF8 3' | atcgtttcacatgtaggg     |
| PRPF8 5'           | tttccacaggcttgaggttg  | PRPF8 3' | gcttcaggatcacttttccc   |
| PRPF8 5'           | gtggaaagcattcccaaac   | PRPF8 3' | cgacctgatccattctctg    |
| PRPF8 5'           | cagcttagtcaaacgcagaa  | PRPF8 3' | caagatcagatccttgagct   |
| PRPF8 5'           | atactgcacgtgactatcca  | PRPF8 3' | tgtttttcttcccgtagtca   |



|                    |                       |          |                      |
|--------------------|-----------------------|----------|----------------------|
| MDN1 5' additional | acagcattctgagaagcaac  | SunTagV4 | acctcgttctcaagatgata |
| MDN1 5' additional | tcctattggtcctccaaca   | SunTagV4 | cggaaccttcttcaaacgc  |
| MDN1 5' additional | cctgtcactgcagctaaata  | SunTagV4 | agttcttcgagagcagttcc |
| MDN1 5' additional | aagctggactttgagaagct  | SunTagV4 | gatcccttttfaatcgagc  |
| MDN1 5' additional | acatctgtgcagcgatacat  | SunTagV4 | tgaaagtagttcctcaccac |
| MDN1 5' additional | atatcctccagaaggatcca  | SunTagV4 | cttcgttttcgaggtgtaa  |
| MDN1 5' additional | aagagctctccattctccaa  | SunTagV4 | ccctgaacctttctttaatc |
| MDN1 5' additional | aaatccaggtgccatttca   | SunTagV4 | tactcagtaattcttccacc |
| MDN1 5' additional | caatttctccacagctcaa   | SunTagV4 | tttcgatagcaactcttcgc |
| MS2V5              | tgattgtgaagtgtcgggtg  | SunTagV4 | ttttgagcctagcaacttc  |
| MS2V5              | tcacccttgtgtattgtac   | SunTagV4 | tttcgagagcaactcctcg  |
| MS2V5              | tgaatgtgtctggagggtg   | SunTagV4 | acctcattttccaagtggta |
| MS2V5              | gcttctgtttgattggattt  | SunTagV4 | tttgctcaataactcctcgc |
| MS2V5              | gatggtgattcctgtttgta  | SunTagV4 | cgcgacttcgttctctaaat |
| MS2V5              | gtatattgcacaggggaatcc | SunTagV4 | ttcgataagagttcttcgcc |
| MS2V5              | gatattcgggagcgtgatc   | SunTagV4 | ctcattttcgaggtgtagt  |
| MS2V5              | acgcactgaattcgaagacc  | SunTagV4 | agtggtagttcttgctcaag |
| MS2V5              | attcgactctgattggctgc  | SunTagV4 | ttcaatctcgcgacctcatt |
| MS2V5              | ctcttcgcgaaagtcgactt  | SunTagV4 | atttctgctgagcaattcct |
| MS2V5              | taagaatggcgcgaaagctg  | SunTagV4 | cgacttcgttctccaatga  |
| MS2V5              | gtaggggagagtggtgttg   | SunTagV4 | cgacttcattttccaagtgg |
| MS2V5              | caggaacgctgatgctgttc  | SunTagV4 | ttgctcaataactcttcgcc |
| MS2V5              | tttcttgagttgggtactg   | SunTagV4 | ttcgttctccaagtggtaat |
| MS2V5              | tgatgctgcatggggacata  | SunTagV4 | agttcttcgataagagctcc |
| MS2V5              | ttggggatgtattcttgggg  | SunTagV4 | gcgacttcattctctaagtg |
| MS2V5              | ttggtgctcggatgtgattt  | SunTagV4 | ttcttctcaagagctcttc  |
| MS2V5              | aagaacaacactccgagcc   | SunTagV4 | cacctcattttccaagtgg  |
| MS2V5              | atggagggtttgtccagttg  | SunTagV4 | ttagatagtaactcttcccc |
| MS2V5              | tttcttgttgggtgagagt   | SunTagV4 | cctcgttctcgagatgataa |
| MS2V5              | ctgatgctgcttcgagaaga  | SunTagV4 | gatagttcttcgacaggagt |
| MS2V5              | gtatgctcagtgtttcgaa   | SunTagV4 | ccttttaagtcttgcacc   |
| MS2V5              | gatcgtccaccaagaaata   | SunTagV4 | ttactgagtagttctcacc  |
| MS2V5              | aattcgtgagagcatgggtg  | SunTagV4 | ttcgtttccaggtggtaat  |
| MS2V5              | tcgtattggacgtggaacga  | SunTagV4 | tctgatcctttctcaaac   |
| MS2V5              | tcgtgatcccgaaggttaag  | SunTagV4 | cttttgagagcagttcttcg |
| MS2V5              | atcgtgcatgcttgaatgtc  | SunTagV4 | gcaacctcattttccaaatg |
| MS2V5              | gttgagacttgggagcatg   | SunTagV4 | tgccactcccttttttaa   |
| MS2V5              | tgaaccatttggtagtttc   | SunTagV4 | tttcgacagaagttcctcac |
| MS2V5              | tttaggttaggagtggttc   | SunTagV4 | gctacttcattctcgagatg |
| MS2V5              | ttgccagtttggggaaga    | SunTagV4 | gagccagaaccttttaag   |
| MS2V5              | tttggtatgttgaatgggc   |          |                      |
| MS2V5              | gatgctgtaccagtaattgt  |          |                      |
| MS2V5              | tagtagtgagagatgtgggc  |          |                      |
| MS2V5              | tgctgaacggtttggtttt   |          |                      |
| MS2V5              | ttgattttccgtgtgtacc   |          |                      |
| MS2V5              | gtcttctgatttgaaac     |          |                      |
| MS2V5              | ttgcgctggacgaaagcgtg  |          |                      |
| MS2V5              | ccgtcggatgttttcgtaa   |          |                      |

|       |                     |  |  |
|-------|---------------------|--|--|
| MS2V5 | ggttgtaagtttggggtg  |  |  |
| MS2V5 | ctgaggtgttgatgtacgg |  |  |

**Table S3:** Probe and antibody combinations used

| <b>Experiment</b> | <b>Combination of probes/antibodies and dyes used (From Table S1)</b>                                  |
|-------------------|--------------------------------------------------------------------------------------------------------|
| MDN1 5'-3'        | MDN1 5' -Cy5<br>MDN1 3' - Dy550                                                                        |
| MDN1 5'-tiling-3' | MDN1 5'+ MDN1 5' additional – Dy488<br>MDN1 tiling – Cy5<br>MDN 3' – Dy550                             |
| MDN1 5'-middle-3' | MDN1 5'+ MDN1 5' additional – Dy488<br>MDN1 middle – Cy5<br>MDN 3' – Dy550                             |
| PRPF8 5'-3'       | PRPF8 5' -Cy5<br>PRPF8 3' - Cy3                                                                        |
| POLA1 5'-3'       | POLA1 5' -Cy3<br>POLA1 3' - Cy5                                                                        |
| TUG1 5'-3'        | TUG1 5' -Cy5<br>TUG1 3' - Cy3                                                                          |
| OIP5-AS1 5'-3'    | OIP5-AS1 5' -Cy5<br>OIP5-AS1 3' - Cy3                                                                  |
| MDN1 tiling-3'    | MDN1 tiling + MDN1 tiling additional– Cy5<br>MDN1 3'– Dy550                                            |
| MDN1 5'-3'-dT     | MDN1 5' -Cy5<br>MDN1 3' - Dy550<br>dT – Cy2                                                            |
| MDN1 tiling-3'-dT | MDN1 tiling + MDN1 tiling additional– Cy5<br>MDN1 3'– Dy550<br>dT- Cy2                                 |
| PRPF8 5'-3'-dT    | PRPF8 5' -Cy5<br>PRPF8 3' - Cy3<br>dT – Cy2                                                            |
| POLA1 5'-3'-dT    | POLA1 5' -Cy3<br>POLA1 3' - Cy5<br>dT – Cy2                                                            |
| TUG1 5'-3'-dT     | TUG1 5' -Cy5<br>TUG1 3' - Cy3<br>dT – Cy2                                                              |
| OIP5-AS1 5'-3'-dT | OIP5-AS1 5' -Cy5<br>OIP5-AS1 3' - Cy3<br>dT – Cy2                                                      |
| SINAPs 5'-3'      | SuntagV4 5' – Quasar 570<br>MS2v5 3' – Cy5<br>Chicken anti-GFP Antibody<br>Goat-Anti Chicken Alexa 488 |

## References

1. Bin Wu, C. Eliscovich, Y. J. Yoon, R. H. Singer, Translation dynamics of single mRNAs in live cells and neurons. *Science*, aaf1084 (2016).
2. D. Rakheja *et al.*, Somatic mutations in DROSHA and DICER1 impair microRNA biogenesis through distinct mechanisms in Wilms tumours. *Nat Comms.* **2**, 4802 (2014).
3. S. Rahman, D. Zenklusen, in *Imaging Gene Expression* (Humana Press, Totowa, NJ, 2013), vol. 1042 of *Methods in Molecular Biology*, pp. 33–46.
4. S. Rahman *et al.*, Single-cell profiling reveals that eRNA accumulation at enhancer-promoter loops is not required to sustain transcription. *Nucleic Acids Res.* **45**, 3017–3030 (2017).
5. R. Thompson, D. Larson, W. Webb, Precise nanometer localization analysis for individual fluorescent probes. *Biophys J.* **82**, 2775–2783 (2002).
6. D. Zenklusen, D. R. Larson, R. H. Singer, Single-RNA counting reveals alternative modes of gene expression in yeast. *Nat Struct Mol Biol.* **15**, 1263–1271 (2008).
7. T. Lionnet *et al.*, A transgenic mouse for in vivo detection of endogenous labeled mRNA. *Nat Methods* (2011), doi:doi:10.1038/nmeth.1551.
8. C. Eliscovich, S. M. Shenoy, R. H. Singer, Imaging mRNA and protein interactions within neurons. *Proceedings of the National Academy of Sciences*, 201621440 (2017).
9. F. Mueller *et al.*, FISH-quant: automatic counting of transcripts in 3D FISH images. *Nat Methods.* **10**, 277–278 (2013).
